# Supplementary material for: Illuminating the Function of the Orphan Transporter, SLC22A10 in Humans and Other Primates
Source: PubMed Central journal article supplement — bioRxiv. 2023 Aug 12:2023.08.08.552553. Preprint. [Version 1] doi: 10.1101/2023.08.08.552553 (PMC10441401; doi:10.1101/2023.08.08.552553), 2023-08-12
Supplement: media-1.pdf [file media-1.pdf]

**Table S1.** List of steroid and steroid glucuronide tested.

| Compound                                | Vendor                    | Catalog number |
|-----------------------------------------|---------------------------|----------------|
| d3-estradiol-3 $\alpha$ -glucuronide    | Toronto Research Chemical | E888017        |
| estradiol-3 $\beta$ -glucuronide        | Sigma-Aldrich             | E2127-5MG      |
| estradiol-17 $\beta$ -glucuronide       | Sigma-Aldrich             | E1127-10mg     |
| estrone-3 $\beta$ -glucuronide          | Toronto Research Chemical | E889055        |
| testosterone-17 $\beta$ -glucuronide    | Steraloids                | A6980-000      |
| androstanediol-3 $\alpha$ -glucuronide  | Steraloids                | A1206-800      |
| etiocholanolone-3 $\alpha$ -glucuronide | Steraloids                | A3625-000      |
| androsterone-3 $\beta$ -glucuronide     | Toronto Research Chemical | A637605        |
| testosterone                            | Sigma-Aldrich             | T1500          |
| progesterone                            | Sigma-Aldrich             | P0130          |

**Table S2.** Steroid and steroid glucuronide mass spectrometer acquisition parameters.

| compound                                | tR<br>(min) | ESI<br>Mode | Q1<br>(Da) | Q3<br>(Da) | DP   | CE  |
|-----------------------------------------|-------------|-------------|------------|------------|------|-----|
| d3-estradiol-3 $\alpha$ -glucuronide    | 1.5         | (-)         | 450.1      | 274.2      | -25  | -25 |
| estradiol-3 $\beta$ -glucuronide        | 1.90        | (-)         | 447.2      | 271.2      | -25  | -25 |
| estradiol-17 $\beta$ -glucuronide       | 1.94        | (-)         | 447.2      | 271.2      | -25  | -40 |
| estrone-3 $\beta$ -glucuronide          | 2.00        | (-)         | 445.2      | 269.2      | -25  | -20 |
| testosterone-17 $\beta$ -glucuronide    | 2.58        | (+)         | 465.3      | 271.2      | 130  | 10  |
| androstanediol-3 $\alpha$ -glucuronide  | 3.44        | (-)         | 467.1      | 291.2      | -100 | -35 |
| etiocholanolone-3 $\alpha$ -glucuronide | 3.45        | (-)         | 465.3      | 113.1      | -25  | -37 |
| androsterone-3 $\beta$ -glucuronide     | 3.46        | (-)         | 465.3      | 85.2       | -25  | -40 |
| testosterone                            | 3.76        | (+)         | 289.3      | 109.1      | 50   | 25  |
| 1-cycloheyl-3-uriedo-decanoic acid      | 4.00        | (+)         | 341.2      | 216.2      | 135  | 28  |
| 1-cycloheyl-3-uriedo-decanoic acid      | 4.00        | (-)         | 339.2      | 214.2      | -140 | -38 |
| progesterone                            | 4.20        | (+)         | 315.2      | 109.1      | 40   | 28  |

The API 4500 source was operated at 650°C, with spray voltage of 4500 V, curtain gas at 34 L/min, Gas 1 at 50 L/min, Gas 2 at 20 L/min, and a collision gas setting of medium using nitrogen.
