# Supplementary material for: Illuminating the Function of the Orphan Transporter, SLC22A10 in Humans and Other Primates
Source: PubMed Central journal article supplement — bioRxiv. 2023 Aug 12:2023.08.08.552553. Preprint. [Version 1] doi: 10.1101/2023.08.08.552553 (PMC10441401; doi:10.1101/2023.08.08.552553), 2023-08-12
Supplement: media-2.pdf [file media-2.pdf]

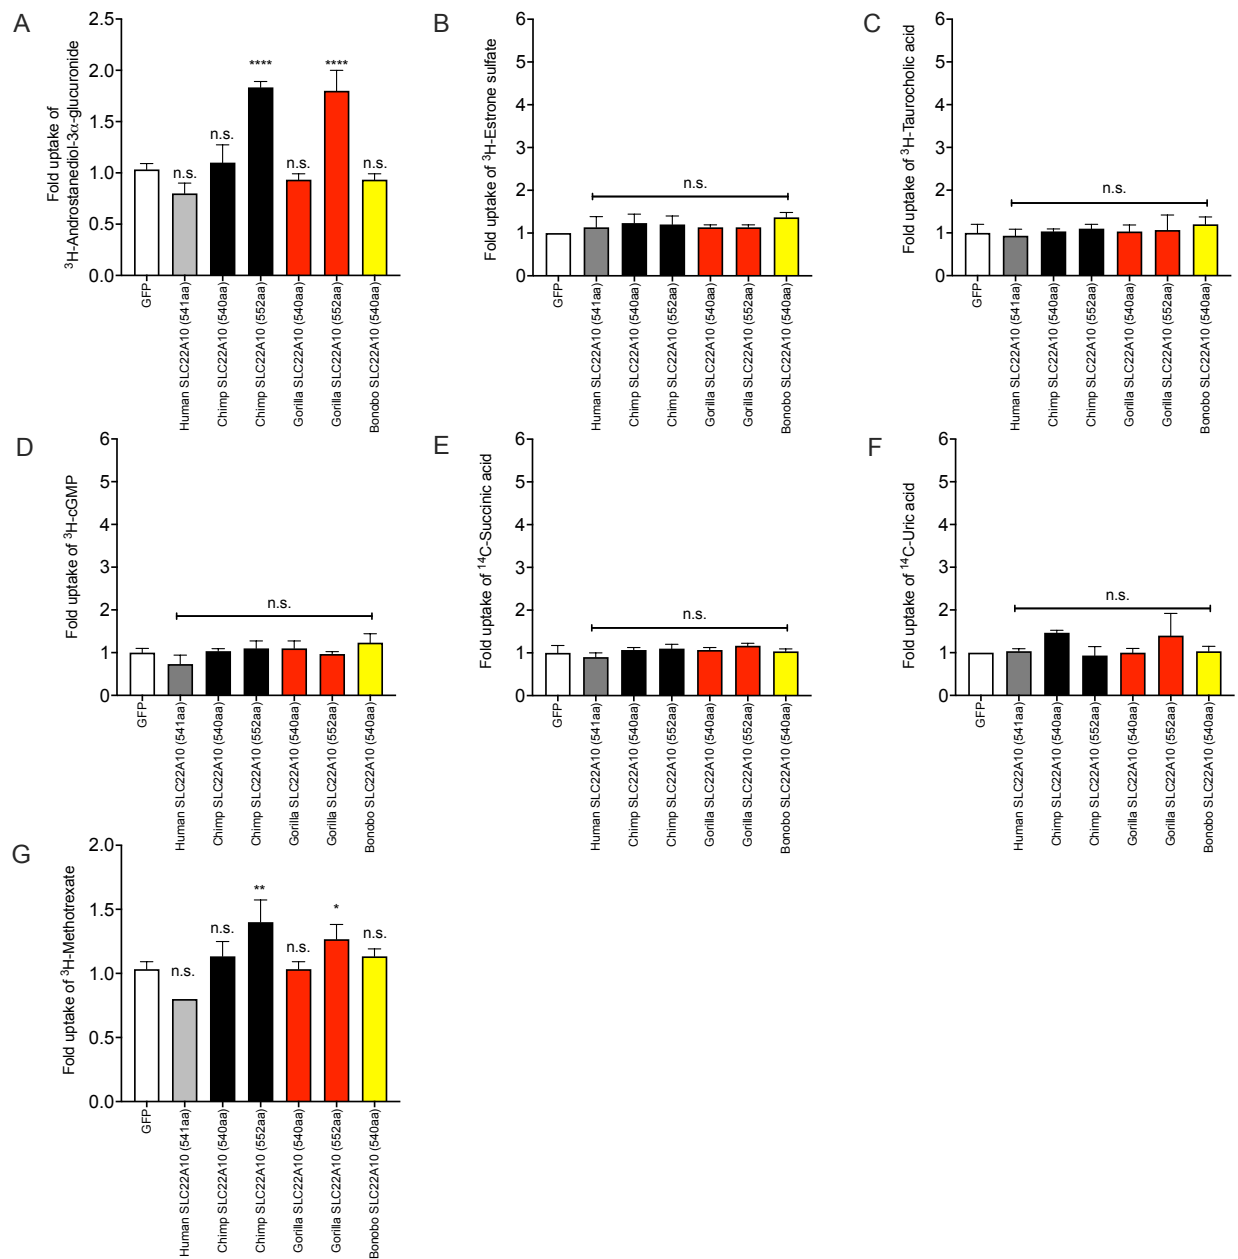

**Supplemental Figure 1.** Six anions were screened as substrates of SLC22A10. (A) [ $^3\text{H}$ ]-androstenediol-3 $\alpha$ -glucuronide; (B) [ $^3\text{H}$ ]-estrone sulfate; (C) [ $^3\text{H}$ ]-taurocholic acid; (D) [ $^3\text{H}$ ]-cGMP; (E) [ $^{14}\text{C}$ ]-succinic acid, (F) [ $^{14}\text{C}$ ]-uric acid, (G) [ $^3\text{H}$ ]-methotrexate. Multiple comparisons were analyzed using one-way analysis of variance followed by Dunnett's two-tailed test. HEK293 cells transiently transfected with GFP vector was used as control. All expression vectors used have GFP-tagged in the N-terminal. One-Way Multiple comparisons were used to compare the mean of each orthologs with the mean of the control (GFP). Data are from one representative experiment in triplicate wells (mean  $\pm$  s.d.). \*\*\*\* $p < 0.0001$ , \*\*\* $p < 0.0005$ , \*\* $p < 0.01$ , \* $p < 0.05$ . Results were replicated in at least one additional experiment.

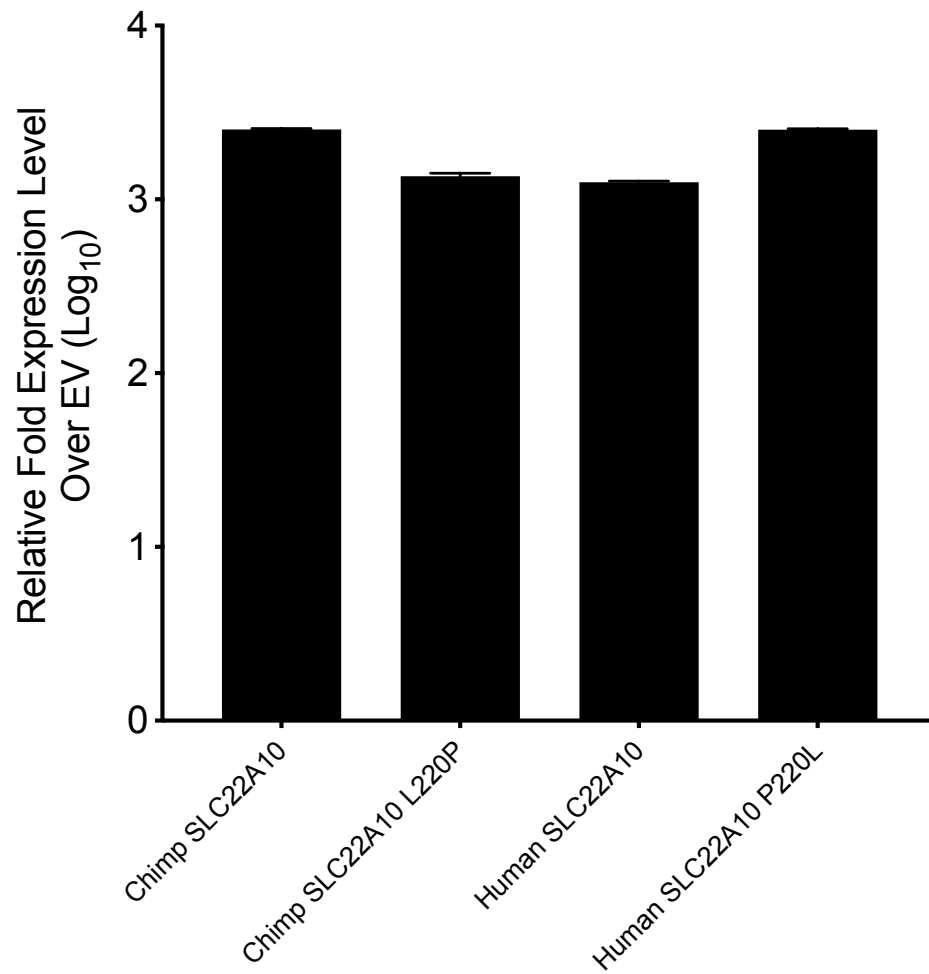

HEK293 Flp-In Cells Transiently Transfected

**Supplemental Figure 2.** Transcript levels of SLC22A10 in HEK293 cells that were transiently transfected with human and chimpanzee SLC22A10, as well as their respective mutations.



project, NCBI had initially predicted the bonobo SLC22A10 isoform to have 538 amino acids (panPan3 assembly) (E). These shorter protein isoforms are derived from alternative acceptor sites (chimpanzee/bonobo) and exon extensions (orangutan/gibbon). Blue shadows indicate a split view of the intron sequence between two exons.

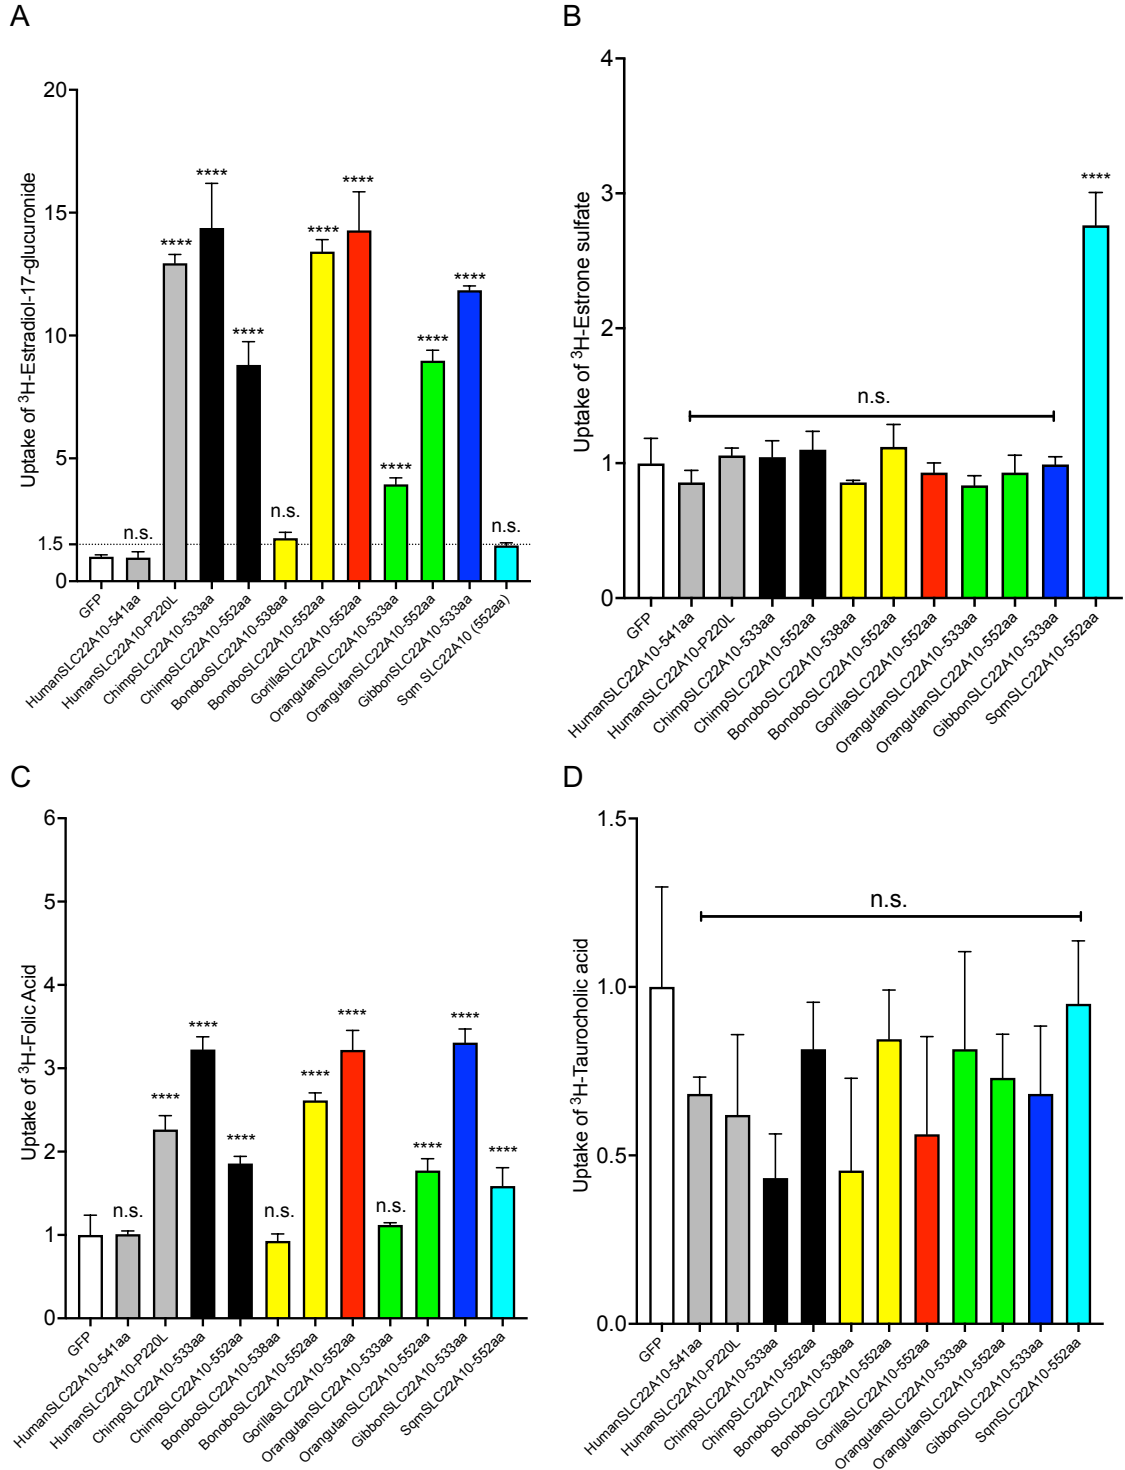

**Supplementary Figure 4.** Four anions were screened as substrates of SLC22A10 of different species and isoforms. Human SLC22A10 and human SLC22A10-P220L are also included in the assay. A. [<sup>3</sup>H]-estradiol-17β-glucuronide; B. [<sup>3</sup>H]-estrone sulfate; C. [<sup>3</sup>H]-folic acid; and D. [<sup>3</sup>H]-taurocholic acid. Multiple comparisons were analyzed using one-way analysis of variance followed by Dunnett's two-tailed test. HEK293 cells transiently transfected with GFP vector was used as control. Data are from one representative

experiment in triplicate wells (mean  $\pm$  s.d.). All expression vectors do not have GFP-tagged. Results was replicated in two independent experiments. n.s. Not significance compared to HEK293 cells transfected with GFP only. One-Way Multiple comparisons were used to compare the mean of each orthologs with the mean of the control (GFP). \*\*\*\* $p < 0.0001$ , \*\*\* $p < 0.0005$ , \*\* $p < 0.01$ , \* $p < 0.05$ . Results were replicated in at least one additional experiment.

chr11:63057925 A/G

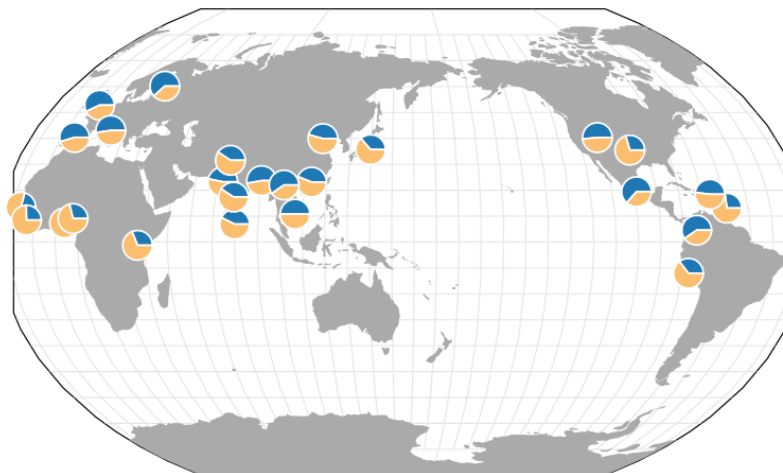

*Frequency Scale - Proportion out of 1*  
The pie below represents a minor allele frequency of 0.25

Sample sizes below 30 become increasingly transparent to represent uncertain frequencies, i.e.

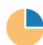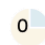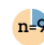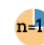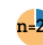

<https://popgen.uchicago.edu/ggv/?data=%221000genomes%22&chr=11&pos=63057925>

11-63290453-G-A

|                  |            |
|------------------|------------|
| Chromosome       | 11         |
| Position         | 63,290,453 |
| Reference allele | G          |
| Alternate allele | A          |
| rsID             | rs1790218  |
| Filter           | PASS       |
| ClinVar          | None       |
| PubMed           | None       |

|                                 |         |
|---------------------------------|---------|
| Samples                         | 132,345 |
| AC (Alternate allele Count)     | 123,421 |
| AF (Alternate allele Frequency) | 0.46628 |
| Heterozygotes                   | 61,911  |
| Homozygotes                     | 30,755  |

| Allele frequency in 1000G |        |
|---------------------------|--------|
| AFR (African)             | 0.2663 |
| ALL (All individuals)     | 0.4335 |
| AMR (Ad Mixed American)   | 0.5058 |
| EAS (East Asian)          | 0.4692 |
| EUR (European)            | 0.5537 |
| SAS (South Asian)         | 0.4479 |

| Allele frequency in gnomAD r2.1 |        |
|---------------------------------|--------|
| AFR (African)                   | 0.2887 |
| ALL (All individuals)           | 0.5175 |
| AMR (Ad Mixed American)         | 0.5078 |
| ASJ (Ashkenazi Jewish)          | 0.4441 |
| EAS (East Asian)                | 0.4216 |
| FIN (Finnish)                   | 0.6062 |
| NFE (Non-Finnish European)      | 0.5754 |
| OTH (Others)                    | 0.5296 |
| SAS (South Asian)               | 0.4521 |

**Supplementary Figure 5.** The distribution of the allele frequency of rs1790218 (SLC22A10-Trp96STOP) varies across different human populations. The rs1790218 variant (G>A) is a nonsense variant that encodes the A-allele and leads to a premature stop codon, resulting in the p.Trp96Ter alteration. The frequency of the A-allele varies, with approximately 28% in African populations and up to 60% in Finnish populations.

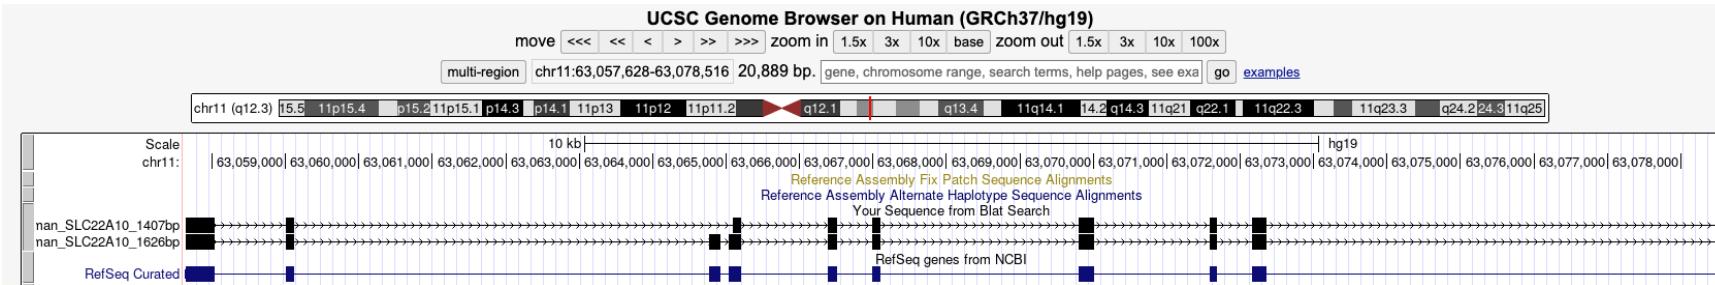

>human SLC22A10 open reading frame (three out of 27 colonies have the full SLC22A10 ORF)

```

ATGGCCTTTGAGGAGCTCTTGAGTCAAGTTGGAGGCCTTGGGAGATTTGAGATGCTTCATCTGGTTTTTATTCTTCCCTCTCTCAT
GTTATTAATCCCTCATATACTGCTAGAGAACTTTGCTGCAGCCATTCTGGTCATCGTTGCTGGGTCCACATGCTGGACAATAATA
CTGGATCTGGTAATGAACTGGAATCCTCAGTGAAGATGCCCTCTTGAGAATCTCTATCCCAGTACTCAAATCTGAGGCCAGA
GAAGTGTTCGTCGCTTTGTCCATCCCCAGTGGCAGCTTCTCACCTGAATGGGACTATCCACAGCACAAGTGAGGCAGACACAGA
ACCCTGTGTGGATGGCTGGGTATATGATCAAAGCTACTTCCCTTCGACCATTGTGACTAAGTGGGACCTGGTATGTGATTATCAG
TCACTGAAATCAGTGGTTCAATTCCTACTTCTGACTGGAATGCTGGTGGGAGGCATCATAGGTGGCCATGTCTCAGACAGGTTTG
GGCGAAGATTTATTCTCAGATGGTGTGTTGCTCCAGCTTGCCATTACTGACACCTGCGCTGCCTTCGCTCCCACCTTCCCTGTTTA
CTGTGTACTACGCTTCTTGGCAGGTTTTTCTTCCATGATCATTATATCAAATAATTCTTTGCCATTACTGAGTGGATAAGGCCCA
ACTCTAAAGCCCTGGTAGTAATATTGTCATCTGGTGCCCTTAGTATTGGACAGATAATCCTGGGAGGCTTGGCTTATGTCTTCCG
AGACTGGCAAACCCTGCACGTGGTGGCGTCTGTACCTTTCTTTGCTTCTTTCTTTCAAGGTGGCTGGTGGAAATCTGCTCGG
TGGTTGATAATACCAATAAACTAGATGAGGGCTTAAAGGCACTTAGAAAAGTTGCACGCACAAATGGAATAAAGAATGCTGAAG
AAACCCTGAACATAGAGGTTGTAAGATCCACCATGCAGGAGGAGCTGGATGCAGCAGACACCAAACTACTGTGTGTGACTTGT
TCCGCAACCCAGTATGCGTAAAGGATCTGTATCCTGGTATTTTTGAGATTTGCAAACACAATACCTTTTTATGGTACCATGGTC
AATCTTCAGCATGTGGGGAGCAACATTTTCTGTTGCAGGTACTTTATGGAGCTGTTCGCTCTCATAGTTTCGATGTCTTGTCTTTT
GACACTAAATCATATGGGCCGTGAATAAGCCAGATATTGTTTCATGTTCTGGTGGGCCTTTCCATTTTGGCCAACACGTTTGTG
CCAAAGAAATGCAGACCCTGCGTGTGGCTTTGGCATGTCTGGGAATCGGCTGTTCTGCTGCTACTTTTTCCAGTGTGCTGTTG
ACTTCATTGAACTCATCCCAGTCTCAGGGCAAGAGCTTCCAGGAATAGATTTAACGGCTAGTAGGATTGGAGCAGCACTGG
CTCCCCTCTTGATGACCTTAACGGTATTTTTTACCCTTTGCCATGGATCATTTATGGAATCTTCCCATCATTGGTGGCCTTATT
GTCTTCCTCCTACCAGAAACCAAGAATCTGCCTTTGCCTGACACCATCAAGGATGTGGAAAATCAAAAAAAAAAATCTCAAGGAAA
AGGCATAA
  
```

>human SLC22A10 open reading frame (23 out of 27 colonies have the 219-bp deletion (in red) of the SLC22A10 ORF)

```

ATGGCCTTTGAGGAGCTCTTGAGTCAAGTTGGAGGCCTTGGGAGATTTGAGATGCTTCATCTGGTTTTTATTCTTCCCTCTCTCAT
GTTATTAATCCCTCATATACTGCTAGAGAACTTTGCTGCAGCCATTCTGGTCATCGTTGCTGGGTCCACATGCTGGACAATAATA
CTGGATCTGGTAATGAACTGGAATCCTCAGTGAAGATGCCCTCTTGAGAATCTCTATCCCAGTACTCAAATCTGAGGCCAGA
GAAGTGTTCGTCGCTTTGTCCATCCCCAGTGGCAGCTTCTCACCTGAATGGGACTATCCACAGCACAAGTGAGGCAGACACAGA
  
```



ACCCTGTGTGGATGGCTGGGTATATGATCAAAGCTACTTCCCTTCGACCATTGTGACTAAGTGGGACCTGGTATGTGATTATCAG  
TCACTGAAATCAGTGGTTCAATTCCTACTTCTGACTGGAATGCTGGTGGGAGGCATCATAGGTGGCCATGTCTCAGACAGGTTTG  
GGCGAAGATTTATTCTCAGATGGTGTGGCTCCAGCTTGCCATTACTGACACCTGCGCTGCCTTCGCTCCCACCTTCCCTGTTTA  
CTGTGTACTACGCTTCTTGGCAGGTTTTCTTCCATGATCATTATATCAAATAATTCTTTGCCATTACTGAGTGGATAAGGCCCA  
ACTCTAAAGCCCTGGTAGTAATATTGTCATCTGGTGCCCTTAGTATTGGACAGATAATCCTGGGAGGCTTGGCTTATGTCTTCCG  
AGACTGGCAAACCCTGCACGTGGTGGCGTCTGTACCTTTCTTTGTCTTCTTTCTTTCAAGGTGGCTGGTGGAAATCTGCTCGG  
TGGTTGATAATCACCAATAAACTAGATGAGGGCTTAAAGGCACTTAGAAAAGTTGCACGCACAAATGGAATAAAGAATGCTGAAG  
AAACCCTGAACATAGAGGTTGTAAGATCCACCATGCAGGAGGAGCTGGATGCAGCACAGACCAAACTACTGTGTGTGACTTGT  
TCCGCAACCCAGTATGCGTAAAAGGATCTGTATCCTGGTATTTTTGAGATTTGCAAACACAATACCTTTTTATGGTACCATGGTC  
AATCTTCAGCATGTGGGGAGCAACATTTTCCTGTTGCAGGTACTTTATGGAGCTGTCGCTCTCATAGTTCGATGTCTTGCTCTTTT  
GACACTAAATCATATGGGCCGTGCAATAAGCCAGATATTGTTTCATGTTCTGGTGGGCCTTTCCATTTTGGCCAACACGTTTGTG  
CCCAAAGAAATGCAGACCCTGCGTGTGGCTTTGGCATGTCTGGGAATCGGCTGTTCTGCTGCTACTTTTTCCAGTGTTGCTGTTT  
ACTTCATTGAACTCATCCCCTGTTCTCAGGGCAAGAGCTTCAGGAATAGATTTAACGGCTAGTAGGATTGGAGCAGCACTGG  
CTCCCCTCTTGATGACCTTAACGGTATTTTTTACCCTTTGCCATGGATCATTTATGGAATCTTCCCCTCATTGGTGGCCTTATT  
GTCTTCTCTACCAGAAACCAAGAATCTGCCTTTGCCTGACACCATCAAGGATGTGGAAAATCAAAAAAAAAAATCTCAAGGAAA  
AGGCATAA

**Supplemental Figure 6.** Human SLC22A10 open reading frame (ORF). The first fasta sequence above is human SLC22A10 ORF with 1626 bp (NM\_001039752). The second fasta sequence has a 219-bp deletion (in red), result in 1407 bp. The two fasta sequence were pasted in UCSC genome browser (hg19) to Blat search. The human SLC22A10 ORF with 1407bp skip the entire exon 3 and early part of exon 4.

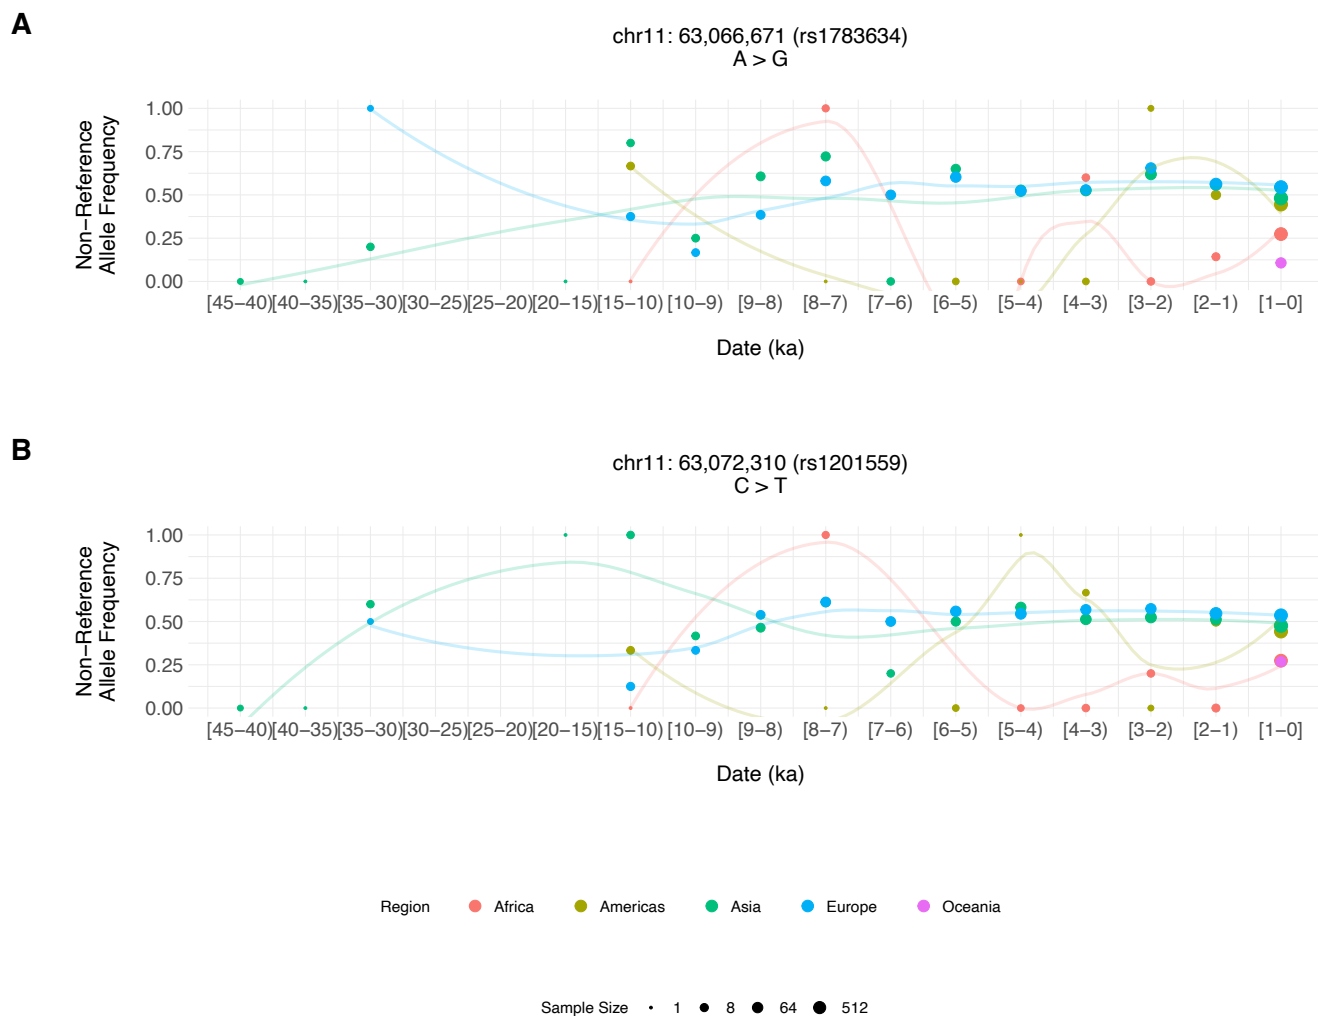

**Supplementary Figure 7.** Allele frequencies of two single nucleotide polymorphisms (SNPs), rs1783634 and rs1201559, were analyzed in diverse human populations. These SNPs are highly correlated ( $D' > 0.9$ ,  $r^2 > 0.9$ ) with SLC22A10-Trp96Ter (rs1790218). The allele frequencies for these two SNPs were obtained from The Simons Genome Diversity Project (<https://www.simonsfoundation.org/simons-genome-diversity-project/>), 1000 Genomes Project, and the Allen Ancient DNA Resources (AADR) (<https://reich.hms.harvard.edu/allen-ancient-dna-resource-aadr-downloadable-genotypes-present-day-and-ancient-dna-data>). The figure displays the allele frequencies of the alleles strongly linked to SLC22A10-96Ter.

Estimated age of the A allele of variant rs1790218 at Chr11 : 63,057,925  
Inference of pairwise TMRCA and allele age based on Joint clock model

Pairs sorted by mean TMRCA

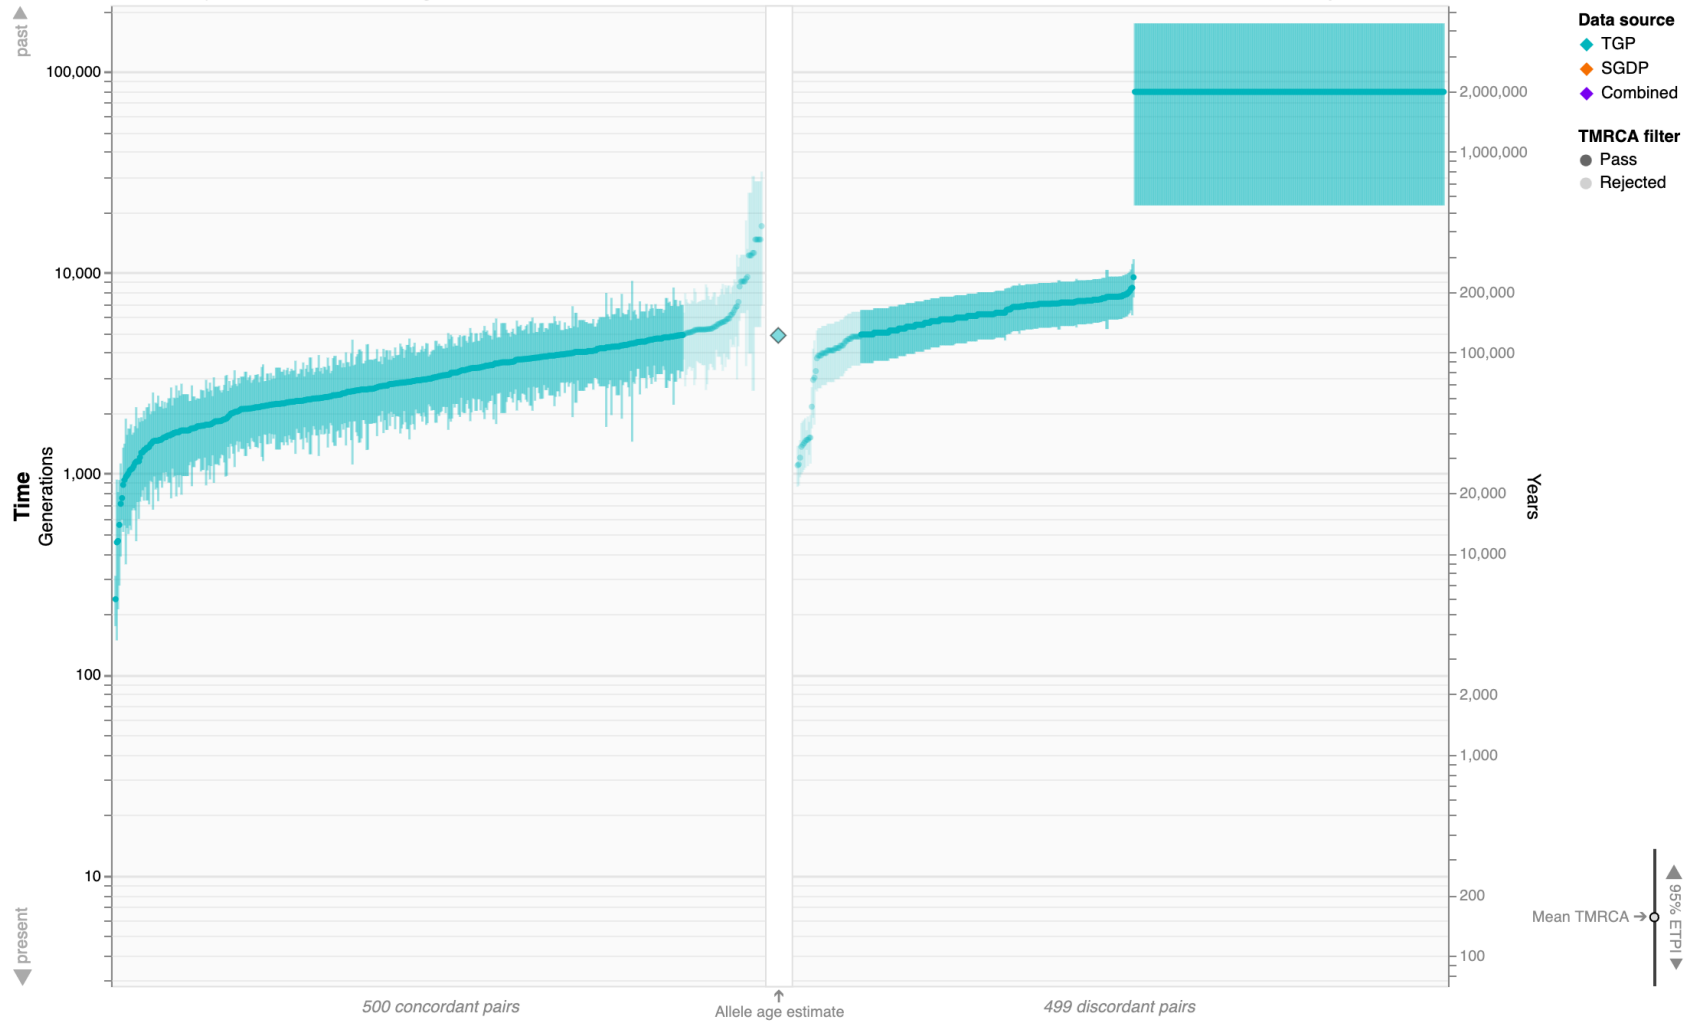

**Supplementary Figure 8.** Allele age estimate for rs1790218 (G > A) from the Human Genome Dating portal using the joint clock model. The A allele is estimated to emerge 4,873 generations or 121,825 years ago (quality score = 0.878). ETPI = equal-tailed probability interval (95% credible interval), SGDP = Simons Genome Diversity Project, TGP = 1000 Genomes Project, TMRCA = time to most recent common ancestor.
